# Supplementary material
Source: ML conference proceedings conference paper supplement (https://openaccess.thecvf.com/content/CVPR2026/html/Jia_Geometry-driven_OOD_Detectors_CVPR_2026_paper.html)
Supplement: Supplementary file 1 [file Jia_Geometry-driven_OOD_Detectors_CVPR_2026_supplemental.pdf]

# Supplementary Material of Geometry-driven OOD Detectors Are Class-Incremental Learners

Wangwang Jia<sup>1,2†</sup>, Zijian Gao<sup>1,3†</sup>, Tianjiao Wan<sup>1,3</sup>, Yuan Cao<sup>1,2</sup>, Yong Dou<sup>1,2</sup>, Kele Xu<sup>1,3\*</sup>

<sup>1</sup>College of Computer Science and Technology, National University of Defense Technology

<sup>2</sup>National Key Laboratory of Parallel and Distributed Computing, National University of Defense Technology

<sup>3</sup>State Key Laboratory of Complex & Critical Software Environment

{wangwangjia, gaozijian19, yuanc, yongdou, xukelelele}@nudt.edu.cn

## 1. Detailed Proofs of Theorem 1

In **Section 4.1** of the main paper, we introduced Theorem 1 to establish a tractable upper bound for the separation metric  $D_t$ . We now present the detailed theoretical proof of this theorem. To facilitate the proof, we first introduce several auxiliary lemmas, detailed as follows.

**Lemma 1** (Upper Bound on Expected OOD Score). *Let  $P_{t,c'}^{OOD}$  be the feature distribution for an OOD class  $c'$ . Let  $d_{M,t}(\cdot, \cdot)$  be the Mahalanobis distance w.r.t.  $\Sigma_t$ , and let  $\alpha_{c,c'} := \frac{1}{2}d_{M,t}(\mu_{IND,c}, \mu_{OOD,c'})$ . The expected score for a random OOD sample is bounded by:*

$$\mathbb{E}_{x \sim \bigcup_{m \neq t} \mathcal{D}_m} [ES_t(x)] \leq \frac{1}{k_{OOD}} \sum_{c' \in \bigcup_{m \neq t} \mathcal{C}_m} \sum_{c \in \mathcal{C}_t} \left( (1 - P_{t,c'}^{OOD}(B_{\alpha_{c,c'}}(\mu_{OOD,c'}))) + \exp\left(-\frac{\alpha_{c,c'}^2}{2}\right) \right) \quad (1)$$

where  $B_r(u)$  is an open ball of radius  $r$  centered at  $u$  in the Mahalanobis distance.

*Proof.* The total expectation over OOD data is the average of expectations over each OOD class  $c'$ , assuming uniform weighting:

$$\mathbb{E}_{x \sim \bigcup_{m \neq t} \mathcal{D}_m} [ES_t(x)] = \frac{1}{k_{OOD}} \sum_{c' \in \bigcup_{m \neq t} \mathcal{C}_m} \mathbb{E}_{x \sim \mathcal{D}_{m,c'}} [ES_t(x)].$$

By linearity, the inner expectation is a sum over the IND classes:

$$\mathbb{E}_{x \sim \mathcal{D}_{m,c'}} [ES_t(x)] = \sum_{c \in \mathcal{C}_t} \mathbb{E}_{z \sim P_{t,c'}^{OOD}} \left[ \exp\left(-\frac{1}{2}d_{M,t}(z, \mu_{IND,c})^2\right) \right].$$

We analyze a single term from the sum. The expectation can be written as an integral split into the ball  $B_{\alpha_{c,c'}}(\mu_{OOD,c'})$

and its complement  $B_{\alpha_{c,c'}}^c$ :

$$\begin{aligned} & \mathbb{E}_{z \sim P_{t,c'}^{OOD}} \left[ \exp\left(-\frac{1}{2}d_{M,t}(z, \mu_{IND,c})^2\right) \right] \\ &= \int_{B_{\alpha_{c,c'}}} \exp\left(-\frac{1}{2}d_{M,t}(z, \mu_{IND,c})^2\right) p_{t,c'}^{OOD}(z) dz \\ &+ \int_{B_{\alpha_{c,c'}}^c} \exp\left(-\frac{1}{2}d_{M,t}(z, \mu_{IND,c})^2\right) p_{t,c'}^{OOD}(z) dz. \end{aligned}$$

To bound the first integral, consider any feature  $z \in B_{\alpha_{c,c'}}(\mu_{OOD,c'})$ . By definition, this implies  $d_{M,t}(z, \mu_{OOD,c'}) \leq \alpha_{c,c'}$ . The triangle inequality states  $d_{M,t}(a, b) \leq d_{M,t}(a, c) + d_{M,t}(c, b)$ . Applying this gives:

$$d_{M,t}(\mu_{IND,c}, \mu_{OOD,c'}) \leq d_{M,t}(\mu_{IND,c}, z) + d_{M,t}(z, \mu_{OOD,c'}).$$

Rearranging yields a lower bound for the distance of  $z$  to the IND prototype:

$$\begin{aligned} d_{M,t}(z, \mu_{IND,c}) &\geq d_{M,t}(\mu_{IND,c}, \mu_{OOD,c'}) - d_{M,t}(z, \mu_{OOD,c'}) \\ &\geq 2\alpha_{c,c'} - \alpha_{c,c'} = \alpha_{c,c'}. \end{aligned}$$

Using this lower bound for the distance and the fact that  $\exp(\cdot) \leq 1$ , we can bound the expectation:

$$\begin{aligned} & \mathbb{E}_{z \sim P_{t,c'}^{OOD}} \left[ \exp\left(-\frac{1}{2}d_{M,t}(z, \mu_{IND,c})^2\right) \right] \\ &\leq \int_{B_{\alpha_{c,c'}}} \exp\left(-\frac{\alpha_{c,c'}^2}{2}\right) p_{t,c'}^{OOD}(z) dz + \int_{B_{\alpha_{c,c'}}^c} 1 \cdot p_{t,c'}^{OOD}(z) dz \\ &= \exp\left(-\frac{\alpha_{c,c'}^2}{2}\right) P_{t,c'}^{OOD}(B_{\alpha_{c,c'}}) \\ &+ \left(1 - P_{t,c'}^{OOD}(B_{\alpha_{c,c'}})\right). \end{aligned}$$

Using the simpler upper bound where  $\exp(-\alpha^2/2) \cdot$

\*Corresponding author. † Equal Contribution.

$P(B) \leq \exp(-\alpha^2/2)$  since  $P(B) \leq 1$ :

$$\mathbb{E}_{z \sim P_{t,c'}^{\text{OOD}}} \left[ \exp \left( -\frac{1}{2} d_{M,t}(z, \boldsymbol{\mu}_{\text{IND},c})^2 \right) \right] \leq \exp \left( -\frac{\alpha_{c,c'}^2}{2} \right) + \left( 1 - P_{t,c'}^{\text{OOD}}(B_{\alpha_{c,c'}}) \right).$$

Now, we substitute this bound back into the sum over all IND classes  $c \in \mathcal{C}_t$ :

$$\mathbb{E}_{x \sim \mathcal{D}_{m,c'}} [ES_t(x)] \leq \sum_{c \in \mathcal{C}_t} \left( \exp \left( -\frac{\alpha_{c,c'}^2}{2} \right) + \left( 1 - P_{t,c'}^{\text{OOD}}(B_{\alpha_{c,c'}}) \right) \right).$$

Finally, substituting this result into the average over all OOD classes  $c'$  yields the bound stated in the lemma:

$$\begin{aligned} & \mathbb{E}_{x \sim \bigcup_{m \neq t} \mathcal{D}_m} [ES_t(x)] \\ & \leq \frac{1}{k_{\text{OOD}}} \sum_{c' \in \bigcup_{m \neq t} \mathcal{C}_m} \sum_{c \in \mathcal{C}_t} \left( \left( 1 - P_{t,c'}^{\text{OOD}}(B_{\alpha_{c,c'}}(\boldsymbol{\mu}_{\text{OOD},c'}) \right) \right. \\ & \quad \left. + \exp \left( -\frac{\alpha_{c,c'}^2}{2} \right) \right). \end{aligned}$$

This completes the proof.

**Lemma 2** (Total Variation). *Let  $P_1, P_2 \in \mathcal{P}(\mathcal{X})$ . The Total Variation is defined as:*

$$\delta(P_1, P_2) = \sup_{A \in \mathcal{B}} |P_1(A) - P_2(A)|, \quad (2)$$

where  $\mathcal{B}$  denotes the Borel  $\sigma$ -algebra on  $\mathcal{X}$ . Furthermore, let  $\mathcal{F}$  denote the unit ball in  $L^\infty(\mathcal{X})$ ,

$$\mathcal{F} := \{f \in L^\infty(\mathcal{X}) \mid \|f\|_\infty \leq 1\}.$$

Then, the total variation distance can be equivalently characterized as:

$$\delta(P_1, P_2) = \sup_{f \in \mathcal{F}} |\mathbb{E}_{x \sim P_1} f(x) - \mathbb{E}_{x \sim P_2} f(x)|. \quad (3)$$

Immediately following this, we recall that the Kullback-Leibler (KL) divergence for the multivariate Gaussian distribution.

**Lemma 3** (Kullback-Leibler Divergence). *Let  $P_1 \sim \mathcal{N}(\mu_1, \Sigma)$  and  $P_2 \sim \mathcal{N}(\mu_2, \Sigma)$ , then we have the following:*

$$KL(P_1 \| P_2) = \frac{1}{2} ((\mu_1 - \mu_2)^T \Sigma^{-1} (\mu_1 - \mu_2)) = \frac{1}{2} d_M^2(\mu_1, \mu_2). \quad (4)$$

Next, we recall the following inequality that bounds the total variation by KL-divergence.

**Lemma 4** (Pinsker's Inequality). *Let  $P_1, P_2 \in \mathcal{P}(\mathcal{X})$ , then we have the following:*

$$\delta(P_1, P_2) \leq \sqrt{\frac{1}{2} KL(P_1 \| P_2)}. \quad (5)$$

Furthermore, the subsequent version, which holds true when KL is large, is also valid:

$$\delta(P_1, P_2) \leq 1 - \frac{1}{2} \exp(-KL(P_1 \| P_2)). \quad (6)$$

**Lemma 5** (Upper Bound on the Separation Metric  $D_t$ ). *We define the scaled prototype distance as  $\alpha_{c,c'} := \frac{1}{2} d_{M,t}(\boldsymbol{\mu}_{\text{IND},c}, \boldsymbol{\mu}_{\text{OOD},c'})$ . The separation metric  $D_t$  defined in Eq. (6) is then bounded as follows:*

$$D_t \leq \frac{1}{k_{\text{OOD}}} \sum_{c' \in \bigcup_{m \neq t} \mathcal{C}_m} \sum_{c \in \mathcal{C}_t} \alpha_{c,c'}. \quad (7)$$

*Proof of Lemma 5.* First, by its definition (Eq. (6)), the score function  $ES_t(x)$  is a sum of  $C_t = k_{\text{IND}}$  terms, each bounded in  $[0, 1]$ . This implies  $ES_t(x) \in [0, C_t]$ .

Therefore, by Lemma 2, we have,

$$D_t = \mathbb{E}_{x \sim P_{\text{IND}}} [ES_t(x)] - \mathbb{E}_{x \sim P_{\text{OOD}}} [ES_t(x)] \leq C_t \cdot \delta(P_{\text{IND}}, P_{\text{OOD}}).$$

Next, we decompose the total variation distance. Let  $P_{\text{IND}} = \frac{1}{C_t} \sum_{c \in \mathcal{C}_t} P_{\text{IND},c}$  and  $P_{\text{OOD}} = \frac{1}{k_{\text{OOD}}} \sum_{c' \in \bigcup_{m \neq t} \mathcal{C}_m} P_{\text{OOD},c'}$ . By the definition of total variation and the triangle inequality, the distance can be decomposed as follows:

$$\begin{aligned} & \delta(P_{\text{IND}}, P_{\text{OOD}}) \\ & = \sup_{A \subseteq \mathcal{B}} \left| \frac{1}{C_t} \sum_{c \in \mathcal{C}_t} P_{\text{IND},c}(A) - \frac{1}{k_{\text{OOD}}} \sum_{c' \in \bigcup_{m \neq t} \mathcal{C}_m} P_{\text{OOD},c'}(A) \right| \\ & = \sup_{A \subseteq \mathcal{B}} \left| \frac{1}{C_t k_{\text{OOD}}} \sum_{c \in \mathcal{C}_t} \sum_{c' \in \bigcup_{m \neq t} \mathcal{C}_m} (P_{\text{IND},c}(A) - P_{\text{OOD},c'}(A)) \right| \\ & \leq \frac{1}{C_t k_{\text{OOD}}} \sum_{c \in \mathcal{C}_t} \sum_{c' \in \bigcup_{m \neq t} \mathcal{C}_m} \sup_{A \subseteq \mathcal{B}} |P_{\text{IND},c}(A) - P_{\text{OOD},c'}(A)| \\ & = \frac{1}{C_t k_{\text{OOD}}} \sum_{c \in \mathcal{C}_t} \sum_{c' \in \bigcup_{m \neq t} \mathcal{C}_m} \delta(P_{\text{IND},c}, P_{\text{OOD},c'}). \end{aligned}$$

By Lemma 4 and 3, for Gaussian feature distributions  $P_{\text{IND},c} \sim \mathcal{N}(\boldsymbol{\mu}_{\text{IND},c}, \Sigma_t)$  and  $P_{\text{OOD},c'} \sim \mathcal{N}(\boldsymbol{\mu}_{\text{OOD},c'}, \Sigma_t)$  with a shared covariance, we can bound the pairwise total

variation by the Mahalanobis distance:

$$\begin{aligned}\delta(P_{\text{IND},c}, P_{\text{OOD},c'}) &\leq \sqrt{\frac{1}{2}KL(P_{\text{IND},c} \| P_{\text{OOD},c'})} \\ &= \sqrt{\frac{1}{2} \cdot \frac{1}{2} d_{M,t}^2(\boldsymbol{\mu}_{\text{IND},c}, \boldsymbol{\mu}_{\text{OOD},c'})} \\ &= \frac{1}{2} d_{M,t}(\boldsymbol{\mu}_{\text{IND},c}, \boldsymbol{\mu}_{\text{OOD},c'}).\end{aligned}$$

Putting all together, we have

$$\begin{aligned}D_t &\leq C_t \cdot \left( \frac{1}{C_t k_{\text{OOD}}} \sum_{c \in \mathcal{C}_t} \sum_{c' \in \bigcup_{m \neq t} \mathcal{C}_m} \delta(P_{\text{IND},c}, P_{\text{OOD},c'}) \right) \\ &\leq \frac{1}{k_{\text{OOD}}} \sum_{c \in \mathcal{C}_t} \sum_{c' \in \bigcup_{m \neq t} \mathcal{C}_m} \frac{1}{2} d_{M,t}(\boldsymbol{\mu}_{\text{IND},c}, \boldsymbol{\mu}_{\text{OOD},c'}) \\ &= \frac{1}{k_{\text{OOD}}} \sum_{c' \in \bigcup_{m \neq t} \mathcal{C}_m} \sum_{c \in \mathcal{C}_t} \alpha_{c,c'}.\end{aligned}$$

This completes the proof.

Equipped with these lemmas, we now present the formal proof of Theorem 1.

*Proof of Theorem 1.* By Lemma 5, we obtain an upper bound for  $D_t$  as:

$$D_t \leq \frac{1}{2k_{\text{OOD}}} \sum_{c' \in \bigcup_{m \neq t} \mathcal{C}_m} \sum_{c \in \mathcal{C}_t} d_M(\boldsymbol{\mu}_{\text{IND},c}, \boldsymbol{\mu}_{\text{OOD},c'}).$$

Let

$$c_0(c') = \arg \min_{c \in \mathcal{C}_t} d_M(\boldsymbol{\mu}_{\text{OOD},c'}, \boldsymbol{\mu}_{\text{IND},c}) \quad (8)$$

where  $\boldsymbol{\mu}_{\text{IND},c_0(c')}$  is the IND mean colsest to  $\boldsymbol{\mu}_{\text{OOD},c'}$ . By the triangle inequality, we have:

$$\begin{aligned}d_M(\boldsymbol{\mu}_{\text{IND},c}, \boldsymbol{\mu}_{\text{OOD},c'}) &\leq d_M(\boldsymbol{\mu}_{\text{OOD},c'}, \boldsymbol{\mu}_{\text{IND},c_0(c')}) \\ &\quad + d_M(\boldsymbol{\mu}_{\text{IND},c_0(c')}, \boldsymbol{\mu}_{\text{IND},c}).\end{aligned} \quad (9)$$

Summing over all terms, we obtain:

$$\begin{aligned}\sum_{c' \in \bigcup_{m \neq t} \mathcal{C}_m} \sum_{c \in \mathcal{C}_t} d_M(\boldsymbol{\mu}_{\text{IND},c}, \boldsymbol{\mu}_{\text{OOD},c'}) &\leq \sum_{c' \in \bigcup_{m \neq t} \mathcal{C}_m} \sum_{c \in \mathcal{C}_t} d_M(\boldsymbol{\mu}_{\text{OOD},c'}, \boldsymbol{\mu}_{\text{IND},c_0(c')}) \\ &\quad + \sum_{c' \in \bigcup_{m \neq t} \mathcal{C}_m} \sum_{c \in \mathcal{C}_t} d_M(\boldsymbol{\mu}_{\text{IND},c_0(c')}, \boldsymbol{\mu}_{\text{IND},c}).\end{aligned}$$

Factoring out the constant terms, we have:

$$\begin{aligned}D_t &\leq \frac{1}{2k_{\text{OOD}}} \left( \sum_{c' \in \bigcup_{m \neq t} \mathcal{C}_m} \sum_{c \in \mathcal{C}_t} d_M(\boldsymbol{\mu}_{\text{OOD},c'}, \boldsymbol{\mu}_{\text{IND},c_0(c')}) \right. \\ &\quad \left. + \sum_{c' \in \bigcup_{m \neq t} \mathcal{C}_m} \sum_{c \in \mathcal{C}_t} d_M(\boldsymbol{\mu}_{\text{IND},c_0(c')}, \boldsymbol{\mu}_{\text{IND},c}) \right)\end{aligned}$$

$$\begin{aligned}&= \frac{1}{2k_{\text{OOD}}} \left( \sum_{c' \in \bigcup_{m \neq t} \mathcal{C}_m} (|\mathcal{C}_t| \cdot d_M(\boldsymbol{\mu}_{\text{OOD},c'}, \boldsymbol{\mu}_{\text{IND},c_0(c')})) \right. \\ &\quad \left. + \sum_{c' \in \bigcup_{m \neq t} \mathcal{C}_m} \sum_{c \in \mathcal{C}_t} d_M(\boldsymbol{\mu}_{\text{IND},c_0(c')}, \boldsymbol{\mu}_{\text{IND},c}) \right) \\ &= \frac{1}{2k_{\text{OOD}}} \left( k_{\text{IND}} \sum_{c' \in \bigcup_{m \neq t} \mathcal{C}_m} d_M(\boldsymbol{\mu}_{\text{OOD},c'}, \boldsymbol{\mu}_{\text{IND},c_0(c')}) \right. \\ &\quad \left. + |\bigcup_{m \neq t} \mathcal{C}_m| \cdot \sum_{c \in \mathcal{C}_t} d_M(\boldsymbol{\mu}_{\text{IND},c_0(c')}, \boldsymbol{\mu}_{\text{IND},c}) \right) \\ &= \frac{1}{2k_{\text{OOD}}} \left( k_{\text{IND}} \sum_{c' \in \bigcup_{m \neq t} \mathcal{C}_m} d_M(\boldsymbol{\mu}_{\text{OOD},c'}, \boldsymbol{\mu}_{\text{IND},c_0(c')}) \right. \\ &\quad \left. + k_{\text{OOD}} \sum_{c \in \mathcal{C}_t} d_M(\boldsymbol{\mu}_{\text{IND},c_0(c')}, \boldsymbol{\mu}_{\text{IND},c}) \right) \\ &= \frac{k_{\text{IND}}}{2k_{\text{OOD}}} \sum_{c' \in \bigcup_{m \neq t} \mathcal{C}_m} d_M(\boldsymbol{\mu}_{\text{OOD},c'}, \boldsymbol{\mu}_{\text{IND},c_0(c')}) \\ &\quad + \frac{k_{\text{OOD}}}{2k_{\text{OOD}}} \sum_{c \in \mathcal{C}_t} d_M(\boldsymbol{\mu}_{\text{IND},c_0(c')}, \boldsymbol{\mu}_{\text{IND},c}) \\ &= \frac{k_{\text{IND}}}{2k_{\text{OOD}}} \sum_{c' \in \bigcup_{m \neq t} \mathcal{C}_m} d_M(\boldsymbol{\mu}_{\text{OOD},c'}, \boldsymbol{\mu}_{\text{IND},c_0(c')}) \\ &\quad + \frac{1}{2} \sum_{c \in \mathcal{C}_t} d_M(\boldsymbol{\mu}_{\text{IND},c_0(c')}, \boldsymbol{\mu}_{\text{IND},c}).\end{aligned}$$

This completes the proof.

The derivation above establishes that the upper bound of  $D_t$  relies on the interplay between prototype separation and feature cohesion. This theoretically substantiates that minimizing the bound requires maximizing inter-class separation (**Hypothesis 1**) while enforcing intra-class compactness (**Hypothesis 2**).

## 2. Details on ETF Construction and Neural Collapse Properties

This section supplements the discussion in **Section 5.1** of the main text. Here, we provide the technical specifications for our ETF-based classifier and formally demonstrate its alignment with the NC phenomenon [4], specifically satisfying conditions NC2 through NC4.

**NC Principles.** The NC phenomenon [4] characterizes the terminal phase of training in deep classifiers through four distinct properties:

- **(NC1) Variability Collapse:** Within-class features collapse to their respective class means.
- **(NC2) ETF Convergence:** The class means (prototypes)

converge to a geometric structure known as an Equiangular Tight Frame (ETF).

- **(NC3) Self-Duality:** The classifier weights converge to align with the class means.
- **(NC4) NPC Convergence:** The decision boundaries converge to those of a Nearest Prototype Classifier (NPC).

Our GOD framework explicitly enforces (NC2), (NC3), and (NC4) by strictly fixing the classifier geometry, leaving only (NC1) to be optimized via our representation learning objective.

**ETF Construction.** As introduced in the main text, the fixed anchors  $E_t$  form a Simplex ETF. For a task with  $C_t$  classes in a feature space of dimension  $d$  (where  $d \geq C_t - 1$ ), the weight matrix  $E_t \in \mathbb{R}^{d \times C_t}$  is constructed as:

$$E_t = \sqrt{\frac{C_t}{C_t - 1}} U \left( I_{C_t} - \frac{1}{C_t} \mathbf{1}_{C_t} \mathbf{1}_{C_t}^T \right), \quad (10)$$

where  $I_{C_t}$  is the identity matrix,  $\mathbf{1}_{C_t}$  is the all-ones vector, and  $U \in \mathbb{R}^{d \times C_t}$  is a semi-orthogonal matrix satisfying  $U^T U = I_{C_t}$ , which embeds the simplex into the ambient feature space.

**Properties.** This construction guarantees: 1) *Maximal Separation (NC2):* The cosine similarity between any distinct pair of anchors is minimized and constant, specifically  $\langle e_{t,i}, e_{t,j} \rangle = -\frac{1}{C_t - 1}$  for  $i \neq j$ . 2) *Zero-Mean (Part of NC3):* The anchors are centered at the origin, i.e.,  $\sum_{c=1}^{C_t} e_{t,c} = \mathbf{0}$ .

**Proof of NPC Equivalence (NC4).** We demonstrate that maximizing cosine similarity (used in our framework) is mathematically equivalent to minimizing the Euclidean distance (standard NPC) when feature vectors are  $\ell_2$ -normalized.

Let  $z = z_t(x)$  and  $e_c = e_{t,c}$  be unit-norm vectors (i.e.,  $\|z\|_2 = 1, \|e_c\|_2 = 1$ ). The classification decision rule proceeds as follows:

$$\begin{aligned} \hat{y} &= \arg \min_c \|z - e_c\|_2^2 \\ &= \arg \min_c (\|z\|_2^2 + \|e_c\|_2^2 - 2\langle z, e_c \rangle) \\ &= \arg \min_c (1 + 1 - 2\langle z, e_c \rangle) \\ &= \arg \min_c (2 - 2\langle z, e_c \rangle) \\ &= \arg \max_c \langle z, e_c \rangle. \end{aligned} \quad (11)$$

In summary, by hard-coding the ETF classifier, our framework structurally guarantees the properties of maximal separation (NC2), self-duality (NC3), and nearest-prototype decision boundaries (NC4) without requiring optimization. Consequently, the training process is relieved of the burden of learning a classifier, allowing it to focus entirely on the representation learning objective: compressing intra-class features to satisfy **NC1 (Variability Collapse)**. This focus directly minimizes the intra-class covariance,

thereby tightening the generalization bound derived in our theoretical analysis.

### 3. Theoretical Guarantee of Deterministic OOD Separation

This section provides the rigorous theoretical substantiation for the claims made in **Section 5.1** of the main text. Specifically, we analyze the asymptotic behavior of the GOD detector under ideal training convergence.

**Assumptions.** Let  $t$  denote the current task and  $m$  denote any distinct task ( $m \neq t$ ). **Recall from the main text** that our framework enforces a strict spherical geometry: all feature vectors  $z(\cdot)$  and prototypes  $e$  are projected onto the unit hypersphere  $\mathcal{S}^{d-1}$  (i.e.,  $\|z\|_2 = 1$  and  $\|e\|_2 = 1$ ).

Based on this, we define the "Ideal Conditions" for our analysis:

1. **Ideal Intra-Task Collapse (IND Samples):** For any sample  $x$  belonging to class  $c$  of task  $t$ , the feature representation collapses perfectly to its class prototype:

$$\forall c \in \mathcal{C}_t, \forall x \in \mathcal{D}_{t,c} : z_t(x) = e_{t,c}. \quad (12)$$

2. **Non-Alignment for OOD Samples:** For any sample  $x$  from the current task  $t$ , its representation in the projection space of another task  $m$  does not perfectly align with any prototype of task  $m$ :

$$\forall x \in \mathcal{D}_t, \forall k \in \mathcal{C}_m : z_m(x) \neq e_{m,k}. \quad (13)$$

Since both  $z_m(x)$  and  $e_{m,k}$  are unit vectors, "alignment" refers strictly to directional identity. In high-dimensional spaces ( $d \gg 1$ ), the probability of a sample from one distribution coincidentally having a cosine similarity of exactly 1.0 with a disjoint distribution's prototype is measure zero.

**Proposition 1 (Deterministic Separation).** Under the formulated ideal conditions, for any sample  $x \in \mathcal{D}_{t,c}$ , the GOD detector strictly separates the correct IND class logit from all possible OOD logits. Formally:

$$s_{t,c}(x) = \max_{j \in \mathcal{C}_t} s_{t,j}(x) > \max_{k \in \mathcal{C}_m} s_{m,k}(x), \quad \forall m \neq t. \quad (14)$$

**Proof.** Consider an arbitrary sample  $x \in \mathcal{D}_{t,c}$ .

1. *In-Distribution Analysis (Task t):* By Assumption 1, we have  $z_t(x) = e_{t,c}$ . Since we are on the unit hypersphere ( $\|e_{t,c}\|_2 = 1$ ), the logits correspond to cosine similarities:

$$s_{t,c}(x) = \langle e_{t,c}, e_{t,c} \rangle = \|e_{t,c}\|_2^2 = 1, \quad (15)$$

$$s_{t,j}(x) = \langle e_{t,c}, e_{t,j} \rangle = -\frac{1}{C_t - 1} \quad (\forall j \neq c). \quad (16)$$

Since  $C_t \geq 2$ , we have  $1 > -\frac{1}{C_t - 1}$ . Thus, the maximum IND score is strictly 1:

$$\max_{j \in \mathcal{C}_t} s_{t,j}(x) = s_{t,c}(x) = 1. \quad (17)$$

---

**Algorithm 1** Geometry-driven OOD Detectors (GOD) Training Procedure
 

---

**Input:** Sequential datasets  $\{\mathcal{D}_t\}_{t=1}^T$ ; Pre-trained ViT backbone  $\Phi$ ; Hyperparameters: RP dimension  $d_B$ , ArcFace margin  $m$ , scaling factor  $s$ , EMA momentum  $\alpha$ , and shared layer count  $Num_{SL}$ .

**Initialize:** Shared Random Projection RP (Fixed, mapping to  $\mathbb{R}^{d_B}$ ).

**for** task  $t = 1, \dots, T$  **do**

*## 1. Hybrid Architecture & Geometry Initialization*

**if**  $t = 1$  **then**

    Construct ETF anchors  $E_t = \{e_{t,1}, \dots, e_{t,C_t}\}$  satisfying the ETF property (Shared geometry).

    Initialize Shared LoRA module  $\theta_{SL}$  (defined by  $Num_{SL}$ ).

    Initialize Task-specific LoRA  $\theta_{TL_1}$  and Projection Head  $\theta_{TP_1}$ .

    Set learnable parameters  $\Theta_t = \{\theta_{SL}, \theta_{TL_1}, \theta_{TP_1}\}$ .

**else**

    Retrieve frozen  $\theta_{SL}$ , RP, and shared anchors  $E_t$ .

    Initialize  $\theta_{TL_t}$  with weights from  $\theta_{TL_{t-1}}$  (Warm Start).

    Initialize  $\theta_{TP_t}$  randomly.

    Set learnable parameters  $\Theta_t = \{\theta_{TL_t}, \theta_{TP_t}\}$ .

**end if**

*## 2. Geometry-driven Optimization*

**while** not converged **do**

    Sample batch  $(x, y)$  from  $\mathcal{D}_t$ .

    Extract features via Hybrid LoRA:  $f_t(x) = \Phi(x; \theta_{SL}, \theta_{TL_t})$ .

    Project to unit hypersphere:

$$z_t(x) = \text{Normalize}(\text{TP}_t(\text{RP}(f_t(x)))).$$

    Compute logits via shared ETF anchors:  $s_{t,c}(x) = \langle z_t(x), e_{t,c} \rangle$ .

    Compute Separation Loss  $\mathcal{L}_{\text{ef}}$  via Eq. (14).

    Compute Compactness Loss  $\mathcal{L}_{\text{arc}}$  via Eq. (15).

    Update  $\Theta_t$  to minimize  $\mathcal{L}_{\text{total}} = \mathcal{L}_{\text{ef}} + \mathcal{L}_{\text{arc}}$ .

**end while**

  Save  $\Theta_t$  for inference (Anchors  $E_t$  are shared and persistent).

**end for**

---

2. *Out-of-Distribution Analysis (Task  $m \neq t$ ):* Consider any class  $k$  from an OOD task  $m$ . The logit is  $s_{m,k}(x) = \langle z_m(x), e_{m,k} \rangle$ . Applying the Cauchy-Schwarz inequality:

$$\langle z_m(x), e_{m,k} \rangle \leq \|z_m(x)\|_2 \cdot \|e_{m,k}\|_2. \quad (18)$$

Using the unit norm constraint ( $\|z\| = \|e\| = 1$ ), this bound simplifies to:

$$s_{m,k}(x) \leq 1. \quad (19)$$

Crucially, the equality in Cauchy-Schwarz holds if and only if the two vectors are collinear and in the same direction.

---

**Algorithm 2** Dual-Mode Inference Strategy
 

---

**Input:** Test sample  $x$ ; Universal EMA Adapter  $\Theta^{\text{ema}}$ ; Task-specific parameters  $\{\Theta_t\}_{t=1}^T$ ; Shared parameters  $\theta_{SL}, \text{RP}, E_t$ ; Top- $k$  parameter  $k$ .

**Output:** Predicted Label  $y_{\text{pred}}$ .

*## 1. Coarse Mode (Fast, Single Forward Pass)*

Extract shallow features via Shared LoRA:  $h_{SL} = \Phi_{\text{shallow}}(x; \theta_{SL})$ .

Extract deep features via EMA Adapter:  $f^{\text{ema}}(x) = \Phi_{\text{deep}}(h_{SL}; \Theta^{\text{ema}})$ .

Compute global logits:  $\text{logits}^{\text{EMA}}(x) = \text{Concat}_{t=1}^T (\langle \text{Normalize}(\text{TP}_t(\text{RP}(f^{\text{ema}}(x)))) \rangle, E_t)$ .

Obtain Coarse Prediction:  $\text{Label}_{\text{Coa}} = \arg \max \text{logits}^{\text{EMA}}(x)$ .

*## 2. Refined Mode (Optional, Sparse Activation)*

**if** Mode == Refined **then**

*// Select candidate tasks based on Top- $k$  classes*

  Identify candidate tasks:  $\mathcal{T}_{\text{top-}k} = \{\text{TaskID}(c) \mid c \in \text{Top-}k(\text{logits}^{\text{EMA}}(x))\}$ .

  Initialize refined logits:  $\text{logits}^{\text{Ref}}(x) = \emptyset$ .

**for** each task  $\tau \in \mathcal{T}_{\text{top-}k}$  **do**

*// Re-activate specific experts using cached  $h_{SL}$*

    Extract specific features:  $f_\tau(x) = \Phi_{\text{deep}}(h_{SL}; \Theta_\tau)$ .

    Compute refined logits:  $\text{logits}_\tau^{\text{Ref}}(x) = \langle \text{Normalize}(\text{TP}_\tau(\text{RP}(f_\tau(x)))) \rangle, E_\tau$ .

    Update:  $\text{logits}^{\text{Ref}}(x) \leftarrow \text{logits}^{\text{Ref}}(x) \cup \text{logits}_\tau^{\text{Ref}}(x)$ .

**end for**

  Obtain Refined Prediction:  $\text{Label}_{\text{Ref}} = \arg \max \text{logits}^{\text{Ref}}(x)$ .

**return**  $\text{Label}_{\text{Ref}}$

**else**

**return**  $\text{Label}_{\text{Coa}}$

**end if**

---

By Assumption 2 ( $z_m(x) \neq e_{m,k}$ ), perfect alignment is excluded. Therefore, the inequality is strict:

$$s_{m,k}(x) < 1 \implies \max_{k \in C_m} s_{m,k}(x) < 1. \quad (20)$$

*Conclusion:* Combining Eq. (17) and Eq. (20), we obtain the strict inequality:

$$s_{t,c}(x) = 1 > \max_{k \in C_m} s_{m,k}(x).$$

This concludes the proof.

Thus, this proof serves as the theoretical foundation for **Section 5.1**, confirming that under ideal conditions, the GOD framework inherently possesses a deterministic guarantee for perfect IND classification and OOD rejection.

Table 1. Comparison of Average Accuracy  $\bar{A}$ (%) and Last-Task Accuracy  $A_T$ (%) on ImageNet-R and Stanford Cars with  $T = 20$  tasks. The best results among baselines are marked in blue, and the improvements of our method over them are marked in red.

| Method                      | ImageNet-R<br>$T = 20$ |                      | Stanford Cars<br>$T = 20$ |                      |
|-----------------------------|------------------------|----------------------|---------------------------|----------------------|
|                             | $\bar{A}$              | $A_T$                | $\bar{A}$                 | $A_T$                |
| Finetune                    | 71.14                  | 63.72                | 46.92                     | 33.39                |
| LwF (TPAMI 2018) [2]        | 70.74                  | 64.45                | 37.75                     | 19.19                |
| DualPrompt (ECCV 2022) [8]  | 73.61                  | 67.12                | 45.09                     | 29.68                |
| L2P (CVPR 2022) [9]         | 75.59                  | 68.73                | 49.86                     | 39.59                |
| CODA-Prompt (CVPR 2023) [6] | 71.63                  | 67.93                | 26.56                     | 14.98                |
| LAE (ICCV 2023) [1]         | 72.85                  | 65.57                | 41.63                     | 27.27                |
| DS-AL (AAAI 2024) [17]      | 75.90                  | <b>74.05</b>         | <b>63.17</b>              | 13.97                |
| Aper (ICV 2024) [14]        | 76.28                  | 69.25                | 50.94                     | 38.25                |
| EASE (CVPR 2024) [15]       | 78.15                  | 71.10                | 50.73                     | 35.81                |
| SimpleCIL (ICV 2024) [16]   | 67.60                  | 61.35                | 50.89                     | 38.26                |
| NC-CIPM (AAAI 2025) [10]    | 74.70                  | 68.62                | 61.40                     | 41.05                |
| LORA-DRS (CVPR 2025) [3]    | 79.88                  | 72.12                | 56.65                     | 43.69                |
| SD-LoRA (ICLR 2025) [11]    | <b>81.68</b>           | 73.15                | 54.77                     | <b>43.77</b>         |
| <b>GOD (All)</b>            | <b>82.86</b>           | <b>75.05</b>         | <b>65.93</b>              | <b>49.50</b>         |
| <b>GOD (Coarse)</b>         | <b>81.19</b>           | 73.57                | <b>63.22</b>              | <b>47.20</b>         |
| <b>GOD (Refined)</b>        | <b>82.88 (+1.20)</b>   | <b>75.60 (+1.55)</b> | <b>65.15 (+1.98)</b>      | <b>48.93 (+5.16)</b> |

## 4. Pseudo Code

To facilitate reproducibility, we provide the detailed pseudocode for our Geometry-driven OOD Detectors (GOD) framework. **Algorithm 1** outlines the training procedure, explicitly detailing the construction of the shared ETF geometry and the optimization of the Parameter-Efficient Hybrid Architecture. It highlights the distinct handling of the initial task (learning shared components) versus incremental tasks (freezing shared modules and warm-starting task-specific ones) under the composite objective of separation ( $\mathcal{L}_{\text{eff}}$ ) and compactness ( $\mathcal{L}_{\text{arc}}$ ). **Algorithm 2** presents the Dual-Mode Inference strategy, demonstrating how the *Coarse Mode* utilizes the EMA adapter for rapid global prediction, and how the *Refined Mode* selectively activates specific experts based on Top- $k$  candidates to achieve an optimal trade-off between accuracy and efficiency.

## 5. Implementation Details

Expanding on the experimental setup in **Section 6.1**, we provide further details regarding the network architecture and training strategy. The GOD framework employs a specific two-stage projection head comprising a shared Random Projection (RP) layer and a Task-specific Projection ( $TP_t$ ) layer. The fixed RP layer projects 768-dimensional features into a 3000-dimensional space, while the  $TP_t$  layer maps them back to the 768-dimensional ETF space. To ensure smooth adaptation,  $TP_t$  is randomly initialized for the first task but inherits weights from the preceding task for all subsequent stages. Training is conducted for 40 epochs per task with a batch size of 48, utilizing an SGD optimizer (momentum 0.9) and a cosine annealing learning rate schedule starting at 0.01. For GOD-specific hyperparameters, the EMA momentum  $\alpha$  is set to 0.99. In the ArcFace loss component, the angular margin  $m$  and scale factor  $s$  are set to 0.4 and 64, respectively.

Table 2. Comparison to traditional replay-based CIL methods.

| Method        | Instances    | CIFAR-100 ( $T = 10$ ) |              | Imagenet-R ( $T = 10$ ) |              |
|---------------|--------------|------------------------|--------------|-------------------------|--------------|
|               |              | $\bar{A}$              | $A_T$        | $\bar{A}$               | $A_T$        |
| iCaRL [5]     | 20 / classes | 82.46                  | 73.87        | 72.96                   | 60.67        |
| DER [12]      | 20 / classes | 86.04                  | 77.93        | 80.48                   | 74.32        |
| FOSTER [7]    | 20 / classes | 89.87                  | 84.91        | 81.34                   | 74.48        |
| MEMO [13]     | 20 / classes | 84.08                  | 75.79        | 74.80                   | 66.62        |
| GOD (Refined) | 0            | <b>92.87</b>           | <b>88.11</b> | <b>85.41</b>            | <b>79.20</b> |

Table 3. Ablation study comparing the impact of using different components in GOD (Refined) on the average incremental accuracy  $\bar{A}$ (%).

| $\mathcal{L}_{\text{eff}}$ | $\mathcal{L}_{\text{arc}}$ | RP | Stanford Cars |              | Imagenet-R   |              |
|----------------------------|----------------------------|----|---------------|--------------|--------------|--------------|
|                            |                            |    | $T = 10$      | 5            | $T = 10$     | 5            |
| ✓                          |                            |    | 51.86         | 57.99        | 80.10        | 82.99        |
| ✓                          | ✓                          |    | 65.55         | 75.74        | 84.40        | 86.31        |
| ✓                          |                            | ✓  | 65.99         | 74.37        | 85.07        | 86.83        |
| ✓                          | ✓                          | ✓  | <b>77.10</b>  | <b>85.23</b> | <b>85.41</b> | <b>86.90</b> |

## 6. Extended Evaluation

Here we evaluate the robustness of GOD on a more challenging scenario with total 20 incremental tasks ( $T = 20$ ). This setting significantly amplifies the risk of performance degradation due to the increased task numbers. Table 1 presents the comparative results. GOD consistently outperforms state-of-the-art methods across these long sequences. Notably, on ImageNet-R, **GOD (Refined)** achieves a compelling average accuracy ( $\bar{A}$ ) of 82.88%, surpassing the strongest baseline by 1.20%. Similarly, on Stanford Cars, our method demonstrates exceptional stability, maintaining a Last-Task Accuracy ( $A_T$ ) of 48.93%—a substantial margin of +5.16% over the runner-up. These results empirically validate that our GOD effectively mitigates feature collapse even over prolonged training phases.

## 7. Comparison to Replay-based Methods

In Table 2, we compare GOD with competitive replay-based methods (storing 20 instances per class) using the same PTM. The results are excerpted from [15]. Even without saving instances, GOD shows substantial improvements on CIFAR-100 and ImageNet-R, outperforming the best baseline methods by 3.00% and 3.20% on  $\bar{A}$  and  $A_T$  for CIFAR-100, and by 4.07% and 4.72% on  $\bar{A}$  and  $A_T$  for ImageNet-R, achieving superior results with a clear margin and further proving its effectiveness.

## 8. Additional Quantitative Ablation Studies

Table 3 presents the quantitative ablation results corresponding to the visualizations discussed in the main text. We report the Average Incremental Accuracy ( $\bar{A}$ ) across different benchmarks to validate that the observed geometric improvements translate into tangible performance gains. The baseline model, trained solely with  $\mathcal{L}_{\text{eff}}$ , suffers from

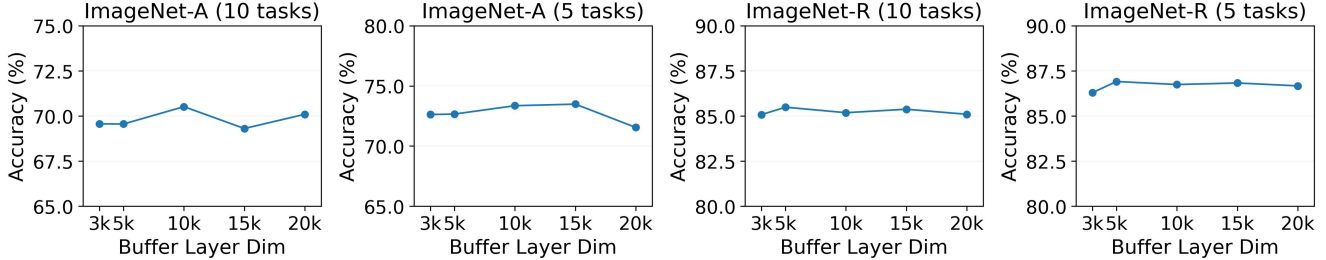

Figure 1. The impact of Random Projection dimension  $d_B$  on metric  $\bar{A}$ (%) in GOD (Refined).

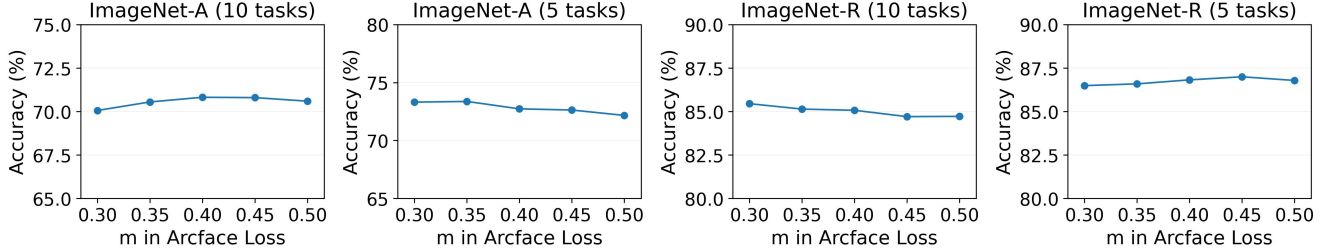

Figure 2. The impact of ArcFace margin  $m$  on metric  $\bar{A}$ (%) in GOD (Refined).

loose feature distributions, resulting in suboptimal performance. For instance, on the Stanford Cars dataset ( $T = 10$ ), the baseline yields a modest  $\bar{A}$  of 51.86%. Introducing individual components brings clear improvements: adding  $\mathcal{L}_{arc}$  to enforce intra-class compactness boosts the accuracy significantly, while applying RP to enhance inter-class separation also yields consistent gains. Specifically, on ImageNet-R ( $T = 10$ ), using  $\mathcal{L}_{arc}$  alone improves the  $\bar{A}$  from 80.10% to 84.40%, a gain of over 4.0%. Crucially, the full framework achieves the best performance across all settings, demonstrating the complementary nature of our proposed components. This synergy is particularly pronounced on the fine-grained Stanford Cars dataset ( $T = 10$ ), where the combination achieves a remarkable  $\bar{A}$  of 77.10%. This represents a substantial improvement of 11.55% compared to using  $\mathcal{L}_{arc}$  alone (65.55%), validating that simultaneously enforcing “high intra-class cohesion” and “low inter-class coupling” is essential for robust incremental learning.

## 9. Hyperparameter Sensitivity Analysis

We conducted a comprehensive sensitivity analysis on four critical hyperparameters. The results consistently demonstrate that GOD maintains high robustness across varying configurations.

**Random Projection Dimension ( $d_B$ ).** Figure 1 investigates the sensitivity of GOD (Refined) to the projection dimension  $d_B$  on the ImageNet-A and ImageNet-R benchmarks. The results demonstrate remarkable stability across a wide range of dimensions ( $3k \sim 20k$ ). Specifically, performance on ImageNet-R remains essentially invariant to variations in  $d_B$ , while ImageNet-A exhibits only marginal fluctuations. Based on these observations, we adopt  $d_B =$

Table 4. Average incremental accuracy  $\bar{A}$ (%) comparison of different values of the number of shared layers  $Num_{SL}$  across various benchmarks and settings in GOD (Refined).

| $Num_{SL}$ | Stanford Cars |              | Imagenet-R   |              |
|------------|---------------|--------------|--------------|--------------|
|            | $T = 10$      | 5            | $T = 10$     | 5            |
| 0          | <b>77.36</b>  | 85.00        | 85.33        | <b>86.99</b> |
| 3          | 77.33         | <b>85.29</b> | 85.34        | 86.75        |
| 6          | 77.24         | 85.05        | 85.16        | 86.79        |
| 9          | 77.10         | 85.23        | <b>85.41</b> | 86.90        |

3000 as the default configuration. This choice minimizes the computational footprint without compromising accuracy, as evidenced by the fact that the model maintains peak performance levels (e.g.,  $> 85\%$  on ImageNet-R) even at this compact dimensionality, significantly outperforming the comparison methods.

**ArcFace Margin ( $m$ ).** Consistent with our findings on projection dimension, the margin parameter  $m$  demonstrates exceptional stability. As visualized in Figure 2, the accuracy curves across both ImageNet-A and ImageNet-R benchmarks are remarkably flat over the investigated range of  $[0.30, 0.50]$ . The performance fluctuations are negligible; for instance, on ImageNet-R ( $T = 10$ ), the variation in accuracy is less than 0.5%. Given this insensitivity, we select  $m = 0.4$  as the default configuration. Crucially, with this fixed margin, our method consistently delivers superior performance compared to the state-of-the-art methods on both ImageNet-A and ImageNet-R benchmarks.

**Number of Shared Layers ( $Num_{SL}$ ).** Turning to the architectural design, Table 4 examines the performance stability under different parameter sharing configurations.

Table 5. Average incremental accuracy  $\bar{A}$ (%) comparison of different values of EMA momentum  $\alpha$  across various benchmarks and settings in GOD (Refined).

| $\alpha$ | Stanford Cars |              | Imagenet-R   |              |
|----------|---------------|--------------|--------------|--------------|
|          | $T = 10$      | 5            | $T = 10$     | 5            |
| 0.9      | <b>77.38</b>  | 85.23        | 84.27        | 86.46        |
| 0.95     | 77.28         | 85.08        | 84.62        | 86.64        |
| 0.99     | 77.10         | 85.23        | <b>85.41</b> | <b>86.90</b> |
| 0.995    | 77.31         | 85.31        | 85.29        | 86.78        |
| 0.999    | 77.04         | <b>85.41</b> | 84.94        | 86.67        |

The proposed method exhibits remarkable robustness to the extent of feature sharing, with fluctuations in Average Incremental Accuracy ( $\bar{A}$ ) remaining negligible (e.g.,  $\sim 0.3\%$ ) between independent learning ( $Num_{SL} = 0$ ) and deep sharing ( $Num_{SL} = 9$ ). Consequently, we adopt  $Num_{SL} = 9$  as the default setting to maximize parameter efficiency. Importantly, even under this highly efficient configuration, our method maintains superior performance over the state-of-the-art approaches. For instance, on the Stanford Cars dataset ( $T = 10$ ), the setting of  $Num_{SL} = 9$  yields an  $\bar{A}$  of 77.10%, which still significantly outperforms the previous best result (SD-LoRA: 73.05%) by over 4%. This confirms that our framework achieves an optimal balance between architectural efficiency and classification accuracy.

**EMA Momentum ( $\alpha$ ).** Finally, Table 5 analyzes the impact of the EMA momentum coefficient  $\alpha$ . The results demonstrate that our framework is highly robust to variations in this hyperparameter, with the **Average Incremental Accuracy ( $\bar{A}$ )** exhibiting minimal fluctuations (mostly  $< 1\%$ ) across the broad range of  $[0.9, 0.999]$ . Based on these findings, we adopt  $\alpha = 0.99$  as the default configuration. Theoretically, a higher momentum (closer to 1) slows down the evolution of the teacher model, thereby prioritizing feature stability and effectively mitigating catastrophic forgetting. Crucially, regardless of the specific  $\alpha$  value chosen within this range, our method consistently yields results superior to the state-of-the-art. For instance, on ImageNet-R ( $T = 10$ ), even with the fixed setting of  $\alpha = 0.99$ , we achieve an  $\bar{A}$  of 85.23%, which remains significantly higher than the previous best result of 82.88% (SD-LoRA), further validating the reliability and effectiveness of our approach.

## References

- [1] Qiankun Gao, Chen Zhao, Yifan Sun, Teng Xi, Gang Zhang, Bernard Ghanem, and Jian Zhang. A unified continual learning framework with general parameter-efficient tuning. In *Proceedings of the IEEE/CVF International Conference on Computer Vision (ICCV)*, pages 11483–11493, 2023. 6
- [2] Zhizhong Li and Derek Hoiem. Learning without forgetting. *IEEE Transactions on Pattern Analysis and Machine Intelligence (TPAMI)*, 40(12):2935–2947, 2017. 6
- [3] Xuan Liu and Xiaobin Chang. Lora subtraction for drift-resistant space in exemplar-free continual learning. In *Proceedings of the Computer Vision and Pattern Recognition Conference*, pages 15308–15318, 2025. 6
- [4] Vardan Papyan, XY Han, and David L Donoho. Prevalence of neural collapse during the terminal phase of deep learning training. *Proceedings of the National Academy of Sciences*, 117(40):24652–24663, 2020. 3
- [5] Sylvestre-Alvise Rebuffi, Alexander Kolesnikov, Georg Sperl, and Christoph H Lampert. icarl: Incremental classifier and representation learning. In *Proceedings of the IEEE conference on Computer Vision and Pattern Recognition (CVPR)*, pages 2001–2010, 2017. 6
- [6] James Seale Smith, Leonid Karlinsky, Vyshnavi Gutta, Paola Cascante-Bonilla, Donghyun Kim, Assaf Arbelle, Rameswar Panda, Rogerio Feris, and Zsolt Kira. Coda-prompt: Continual decomposed attention-based prompting for rehearsal-free continual learning. In *Proceedings of the IEEE/CVF conference on computer vision and pattern recognition (CVPR)*, pages 11909–11919, 2023. 6
- [7] Fu-Yun Wang, Da-Wei Zhou, Han-Jia Ye, and De-Chuan Zhan. Foster: Feature boosting and compression for class-incremental learning. In *Proceedings of the European Conference on Computer Vision (ECCV)*, pages 398–414, 2022. 6
- [8] Zifeng Wang, Zizhao Zhang, Sayna Ebrahimi, Ruoxi Sun, Han Zhang, Chen-Yu Lee, Xiaoqi Ren, Guolong Su, Vincent Perot, Jennifer Dy, et al. Dualprompt: Complementary prompting for rehearsal-free continual learning. In *Proceedings of the European Conference on Computer Vision (ECCV)*, pages 631–648. Springer, 2022. 6
- [9] Zifeng Wang, Zizhao Zhang, Chen-Yu Lee, Han Zhang, Ruoxi Sun, Xiaoqi Ren, Guolong Su, Vincent Perot, Jennifer Dy, and Tomas Pfister. Learning to prompt for continual learning. In *Proceedings of the IEEE/CVF conference on computer vision and pattern recognition (CVPR)*, pages 139–149, 2022. 6
- [10] Kun Wei, Zhe Xu, and Cheng Deng. Compress to one point: Neural collapse for pre-trained model-based class-incremental learning. In *Proceedings of the AAAI Conference on Artificial Intelligence*, pages 21465–21473, 2025. 6
- [11] Yichen Wu, Hongming Piao, Long-Kai Huang, Renzhen Wang, Wanhua Li, Hanspeter Pfister, Deyu Meng, Kede Ma, and Ying Wei. Sd-lora: Scalable decoupled low-rank adaptation for class incremental learning. *arXiv preprint arXiv:2501.13198*, 2025. 6
- [12] Shipeng Yan, Jiangwei Xie, and Xuming He. Der: Dynamically expandable representation for class incremental learning. In *Proceedings of the IEEE/CVF Conference on Computer Vision and Pattern Recognition (CVPR)*, pages 3013–3022, 2021. 6
- [13] Da-Wei Zhou, Qi-Wei Wang, Han-Jia Ye, and De-Chuan Zhan. A model or 603 exemplars: Towards memory-efficient

- class-incremental learning. In *International Conference on Learning Representations (ICLR)*, 2023. [6](#)
- [14] Da-Wei Zhou, Zi-Wen Cai, Han-Jia Ye, De-Chuan Zhan, and Ziwei Liu. Revisiting class-incremental learning with pre-trained models: Generalizability and adaptivity are all you need. *International Journal of Computer Vision (IJCV)*, 2024. [6](#)
- [15] Da-Wei Zhou, Hai-Long Sun, Han-Jia Ye, and De-Chuan Zhan. Expandable subspace ensemble for pre-trained model-based class-incremental learning. In *Proceedings of the IEEE/CVF conference on computer vision and pattern recognition (CVPR)*, pages 23554–23564, 2024. [6](#)
- [16] Da-Wei Zhou, Zi-Wen Cai, Han-Jia Ye, De-Chuan Zhan, and Ziwei Liu. Revisiting class-incremental learning with pre-trained models: Generalizability and adaptivity are all you need. *International Journal of Computer Vision*, 133(3): 1012–1032, 2025. [6](#)
- [17] Huiping Zhuang, Run He, Kai Tong, Ziqian Zeng, Cen Chen, and Zhiping Lin. DS-AL: A dual-stream analytic learning for exemplar-free class-incremental learning. *Proceedings of the AAAI Conference on Artificial Intelligence*, 38(15):17237–17244, 2024. [6](#)
